# Supplementary material for: Metal-free catalytic oxidation of benzylic alcohols for benzaldehyde
Source: Royal Society of Chemistry journal article supplement (doi:10.1039/c8re00265g), 2018-12-07
Supplement: c8re00265g1.pdf [file c8re00265g1.pdf]

## Supporting Information

# Metal-free catalytic oxidation of benzylic alcohols for benzaldehyde

Zhiyong Wang,<sup>a,b</sup> Jie Shi,<sup>a,b</sup> Dan Wang,<sup>\*,a,b</sup> Yuan Pu,<sup>a,b</sup> Jie-Xin Wang,<sup>a,b</sup> Jian-Feng Chen<sup>\*,a,b</sup>

<sup>a</sup> State Key Laboratory of Organic-Inorganic Composites, Beijing University of Chemical Technology, Beijing 100029, China

<sup>b</sup> Research Center of the Ministry of Education for High Gravity Engineering and Technology, Beijing University of Chemical Technology, Beijing 100029, China

\* Corresponding authors: Dan Wang (Tel: +86-10-64449453; E-mail: [wangdan@mail.buct.edu.cn](mailto:wangdan@mail.buct.edu.cn)) and Jian-Feng Chen (Tel: +86-10-64446466; E-mail: [chenjf@mail.buct.edu.cn](mailto:chenjf@mail.buct.edu.cn))

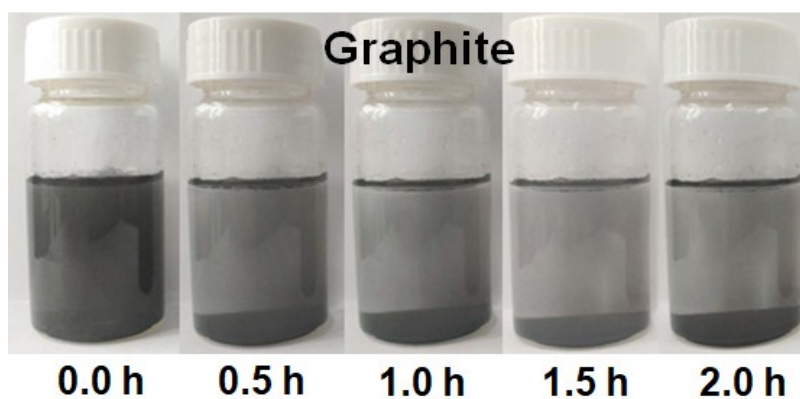

**Fig. S1** Digital photos of graphite dispersion with different durations. (The dispersions are 1 mg/mL in DI water, ultrasonic treatment for 30 min)

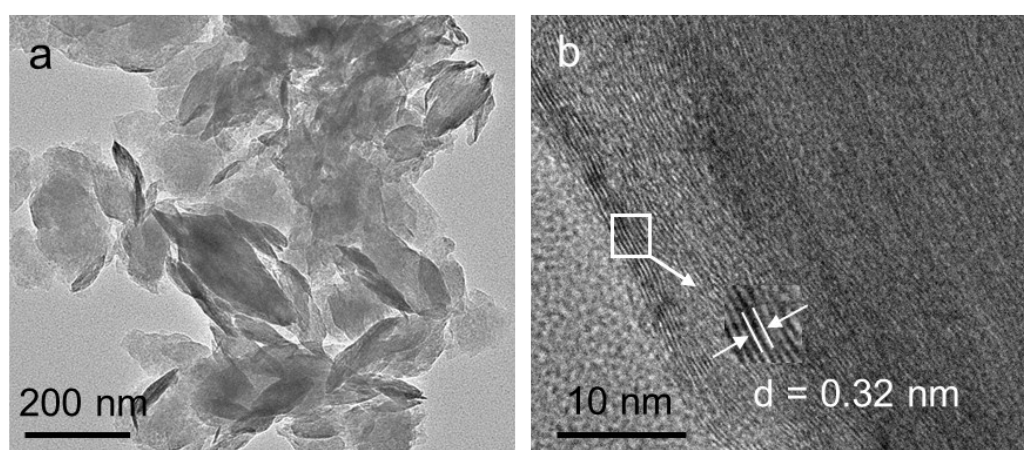

**Fig. S2** (a) TEM image, and (b) HRTEM image of SG

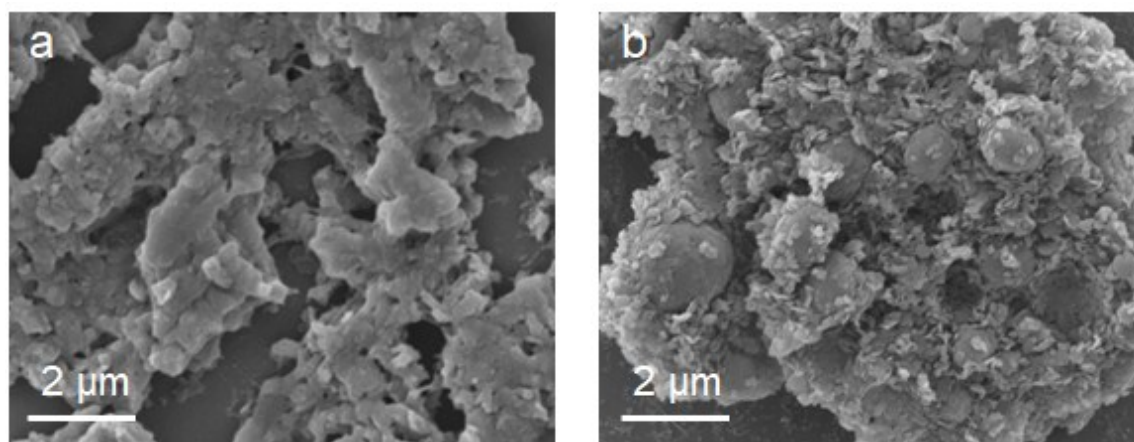

**Fig. S3** SEM images of (a) pristine graphite, and (b) SG.

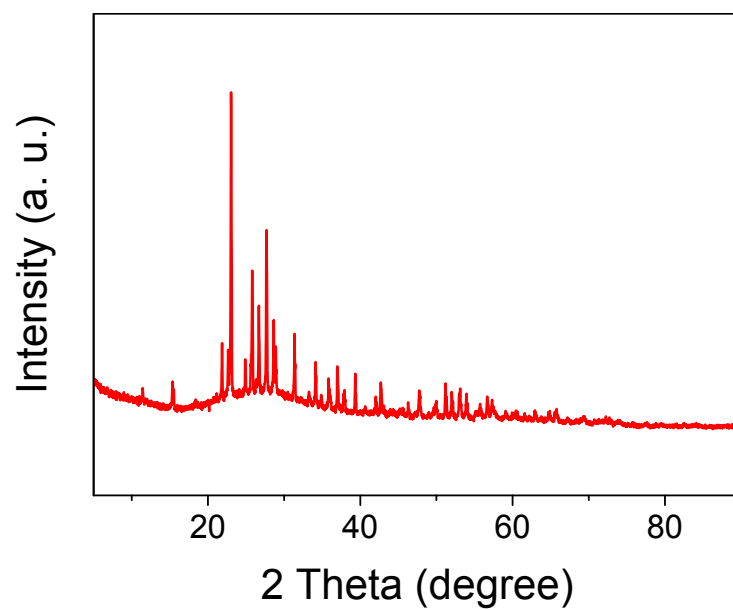

**Fig. S4** XRD patterns of sulfur powder.

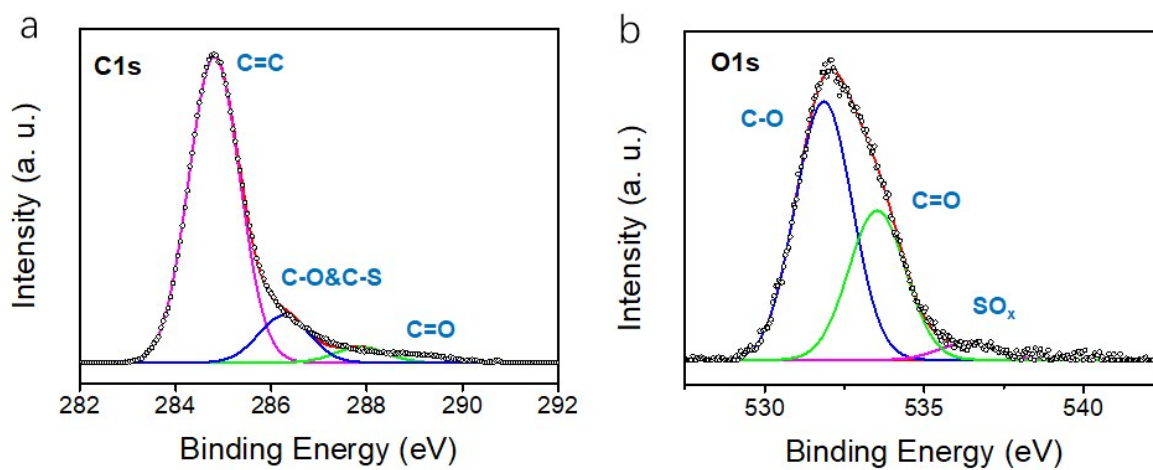

**Fig. S5** High XPS resolution (a) C1 s peak, and (b) O1 s of SG.

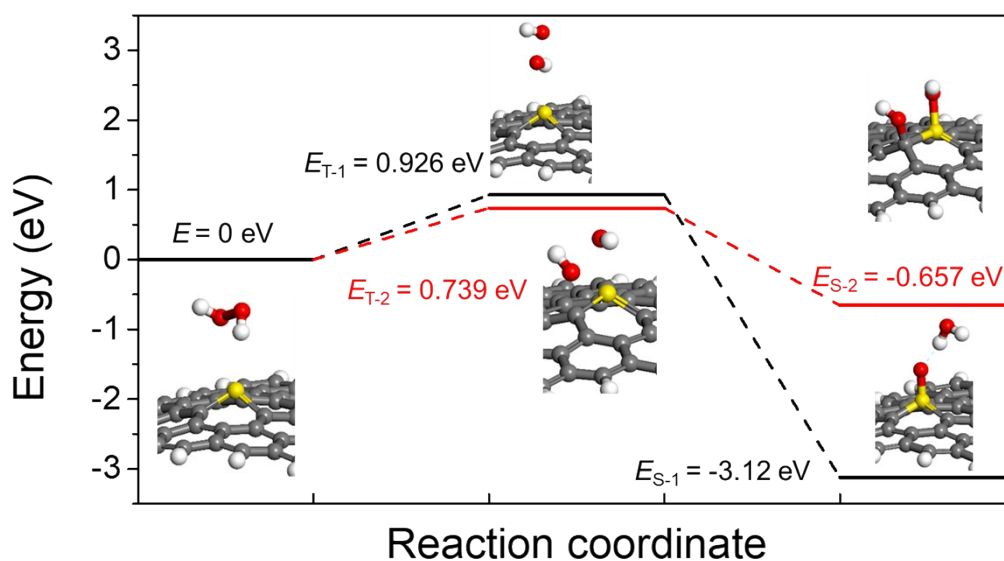

**Fig. S6** Reaction energy profile at different coordinates of the hydroxyl radical ( $\cdot\text{OH}$ ) absorbed by SG on different active sites. (Black line represents two  $\cdot\text{OH}$ s are both absorbed on S atom, red line represents two  $\cdot\text{OH}$ s are absorbed on S atom and adjacent C atom, respectively.)

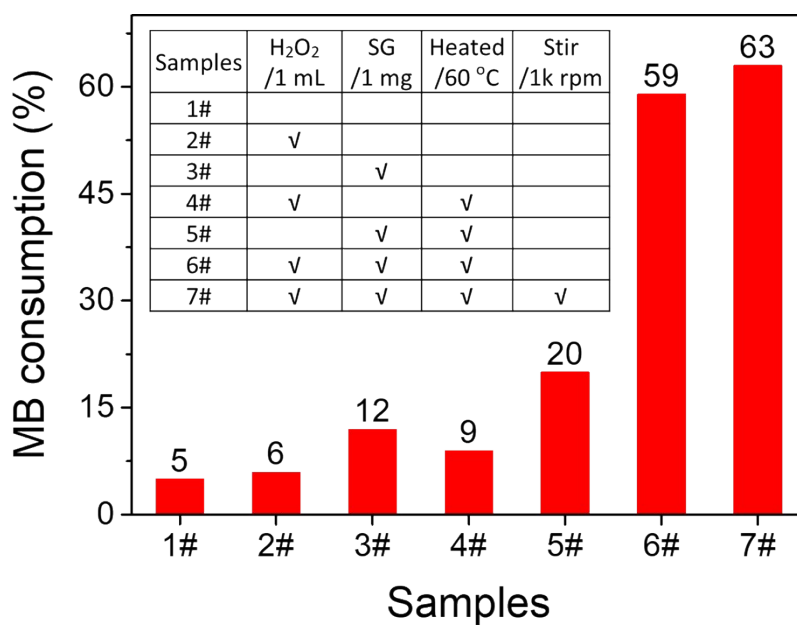

**Fig. S7** MB consumption at different reaction conditions.

**Table S1.** Catalytic oxidation of BzOH to BzH with different catalysts

| <b>Residence<br/>time (min)</b> | <b>Peak area<br/>percentage (%)</b> | <b>Molecular<br/>formula</b>                   | <b>Name</b>              |
|---------------------------------|-------------------------------------|------------------------------------------------|--------------------------|
| 4.82                            | 25.7                                | C <sub>7</sub> H <sub>6</sub> O                | Benzaldehyde             |
| 5.60                            | 72.2                                | C <sub>7</sub> H <sub>8</sub> O                | Benzyl alcohol           |
| 12.10                           | 2.1                                 | C <sub>16</sub> H <sub>22</sub> O <sub>4</sub> | Benzenedicarboxylic acid |

**Table S2.** Catalytic oxidation of BzOH to BzH at different stirring speed

| <b>Entry</b> | <b>Stirring speed<br/>(rpm)</b> | <b>Conversion<br/>(%)</b> | <b>Selectivity<br/>(%)</b> | <b>Yield<br/>(%)</b> |
|--------------|---------------------------------|---------------------------|----------------------------|----------------------|
| 1            | 0                               | 7.10                      | 96.06                      | 6.82                 |
| 2            | 500                             | 6.14                      | 90.86                      | 5.58                 |
| 3            | 750                             | 15.79                     | 91.52                      | 14.45                |
| 4            | 1000                            | 19.22                     | 91.92                      | 17.66                |
| 5            | 1500                            | 17.98                     | 91.82                      | 16.51                |
